# Supplementary material for: Unconventional DNA-relevant π-stacked hydrogen bonded arrays involving supramolecular guest benzoate dimers and cooperative anion–π/π–π/π–anion contacts in coordination compounds of Co(ii) and Zn(ii) phenanthroline: experimental and theoretical studies
Source: Royal Society of Chemistry journal article supplement (doi:10.1039/c9nj05727g), 2020-01-01
Supplement: c9nj05727g1.pdf [file c9nj05727g1.pdf]

## Supplementary Information

### 3.2. IR spectra

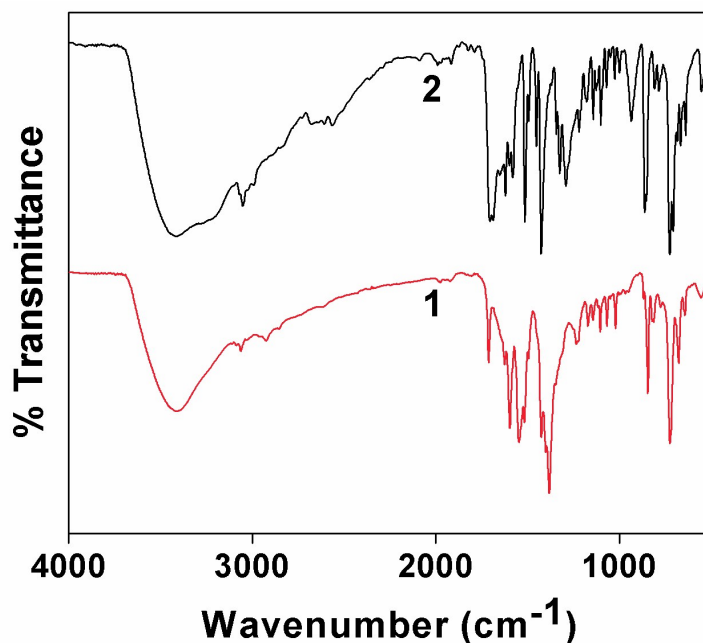

**Fig. S1** FT-IR spectra of compounds **1** and **2**

FT-IR spectra of the synthesized compounds have been recorded in the region 4000–500  $\text{cm}^{-1}$  [Fig. S1]. The coordination of *phen* to the Co(II) and Zn(II) metal centers in complexes **1** and **2** are indicated by the shifting of IR frequencies for  $\delta(\text{C-H})$  vibrations of *phen*.<sup>41</sup> The bands in the range 3421–3370  $\text{cm}^{-1}$  for both the complexes could be assigned to the stretching vibration of the water involving hydrogen bonding.<sup>42</sup> The IR spectral bands within 1300–1650  $\text{cm}^{-1}$  region are difficult to assign due to the appearance of several absorption bands both for the *phen* and bz ligands of the complexes.<sup>43</sup> A strong absorption band at 1539  $\text{cm}^{-1}$  indicates the presence of aromatic bzH in the lattice of compound **2**.<sup>44</sup> The difference between the asymmetric stretching,  $\nu_{\text{as}}(\text{COO}^-)$  and symmetric stretching vibration bands,  $\nu_{\text{s}}(\text{COO}^-)$  for compound **1** is observed below 200  $\text{cm}^{-1}$  which indicates monodentate binding of bz at Co(II) metal centre.<sup>45</sup>

### 3.3 Electronic spectra

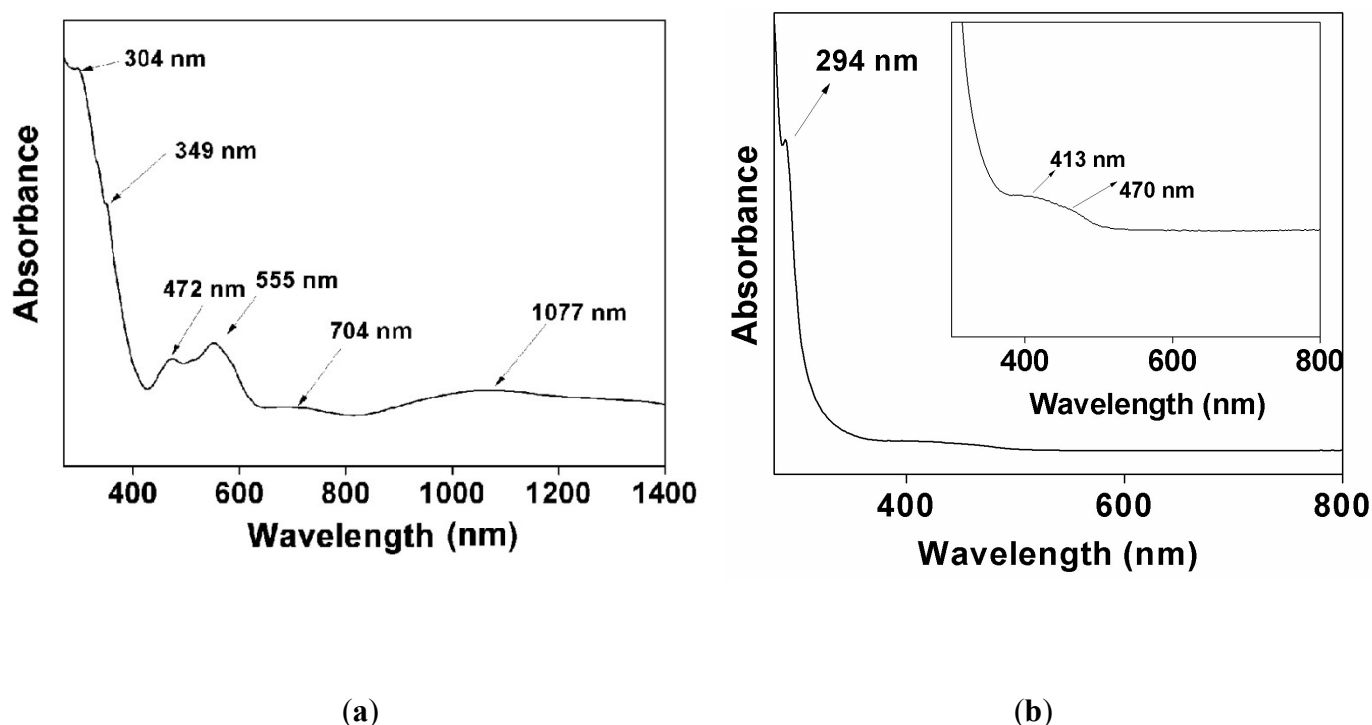

**Fig. S2** (a) Solid state UV-vis-NIR spectrum of **1** (b) UV-vis spectrum of **1** in water (10<sup>-3</sup>M)

Solid state UV-Vis-NIR spectrum of complex **1** exhibit bands at 304 nm and 349 nm assigned to  $\pi \rightarrow \pi^*$  and  $n \rightarrow \pi^*$  transitions of the aromatic ligand [Fig. S2(a)]. Three ligand field bands viz.  ${}^4T_{1g}(F) \rightarrow {}^4T_{2g}(F)$  ( $\nu_1$ ),  ${}^4T_{1g}(F) \rightarrow {}^4A_{2g}(F)$  ( $\nu_2$ ) and  ${}^4T_{1g}(F) \rightarrow {}^4T_{1g}(P)$  ( $\nu_3$ ) for high-spin octahedral Co(II) complex for **1** is observed in solid state spectrum.<sup>46</sup> The first band occurs at 1077 nm, the third band is seen at 472 nm, and the  $\nu_2$  band due to  ${}^4T_{1g}(F) \rightarrow {}^4A_{2g}(F)$  appears at 555 nm. The extra band at 704 nm appeared for  $\nu_2$  can be attributed either to spin orbit coupling or to transition to doublet state.<sup>46</sup> However, the spectrum in water [Fig. S2(b)] shows weak absorption bands at 413 nm and 470 nm assigned to  ${}^4T_{1g}(F) \rightarrow {}^4T_{1g}(P)$  ( $\nu_3$ ) and  ${}^4T_{1g}(F) \rightarrow {}^4A_{2g}(F)$  ( $\nu_2$ ) transitions. The NIR band is not seen in the solution spectrum because of the limit in wavelength window of the spectrophotometer used.<sup>47</sup>

The electronic spectra of compound **2** are shown in Fig. S3. Compound **2** shows no spectral band in the visible region in both aqueous and solid phases, which can be attributed to the  $d^{10}$  configuration of the Zn(II) centre that does not allow any electronic transition to the higher excited electronic states.<sup>48</sup> Characteristic absorptions in the solid and aqueous phase in the wavelength

range 227–275 nm for compound **2** is observed due to  $\pi\text{--}\pi^*$  and  $n\text{--}\pi^*$  transitions of the aromatic ring of *phen* and *bz* moiety. In the wavelength range 297–349 nm, the absorption bands are observed due to ligand to metal charge transfer transitions.<sup>49-50</sup>

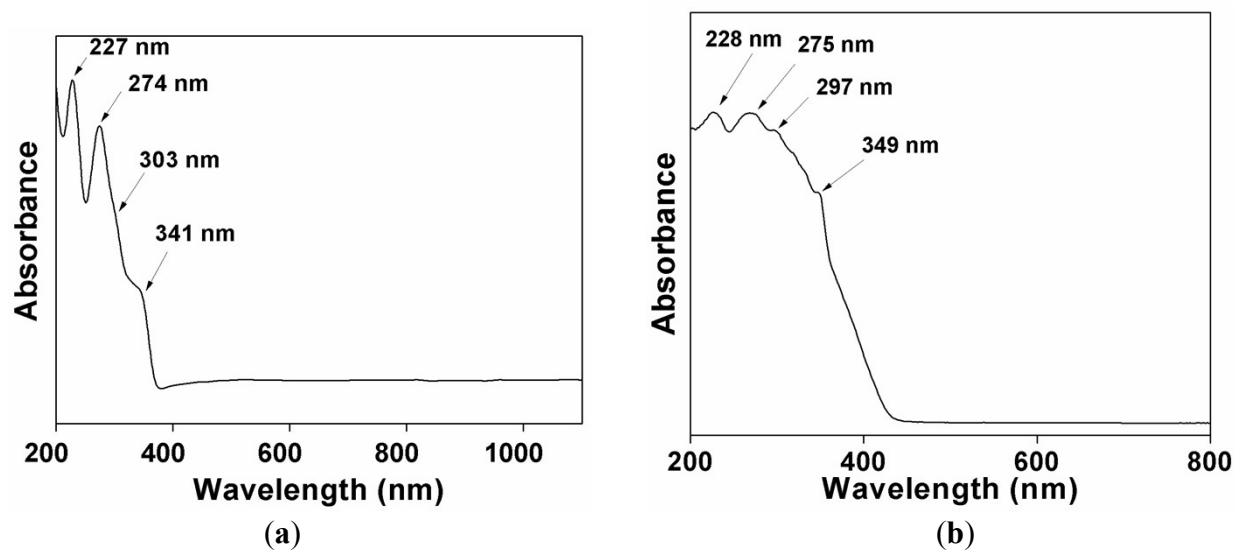

**Fig. S3** (a) Solid state UV-vis-NIR spectrum of **2** (b) UV-vis spectrum of **2** in water ( $10^{-3}\text{M}$ )
